# Supplementary material
Source: PubMed Central journal article supplement (PMC3483451)
Supplement: NIHMS407831-supplement-1.pdf [file NIHMS407831-supplement-1.pdf]

# **OLM interneurons differentially modulate CA3 and entorhinal inputs to hippocampal CA1 neurons**

Richardson N Leão, Sanja Mikulovic, Katarina E Leão, Hermany Munguba, Henrik Gezelius, Anders Enjin, Kalicharan Patra, Anders Eriksson, Leslie M. Loew, Adriano BL Tort & Klas Kullander

## **Supplementary Figures 1-9**

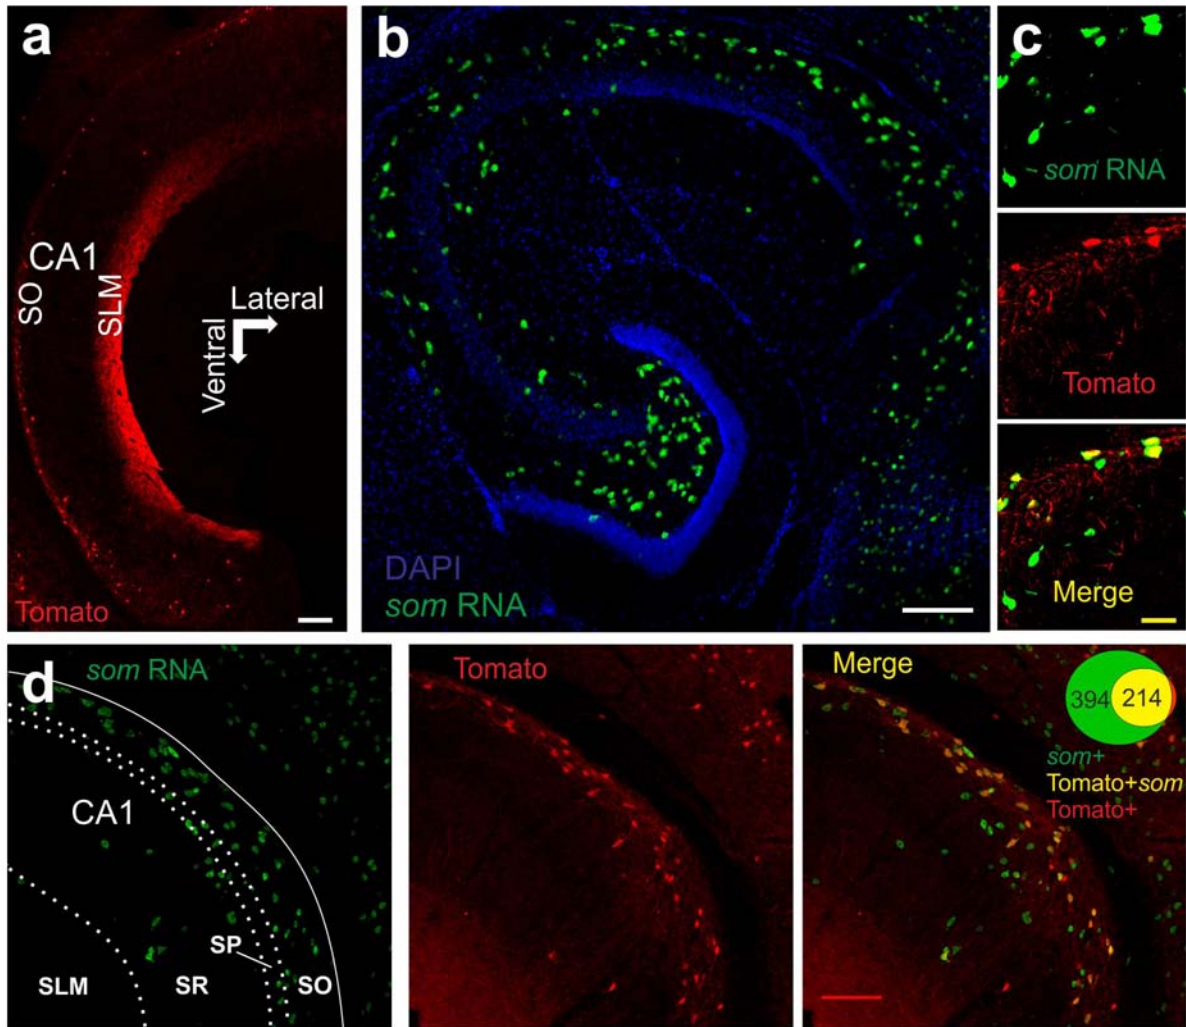

**Supplementary Figure 1. Chrna2<sup>+</sup> cells are a subpopulation of som<sup>+</sup> neurons in the SO of CA1 and subiculum.** (a) Tomato<sup>+</sup> cell distribution in fluorescent photomicrographs of a coronal hippocampal section from a Chrna2-cre/R26<sup>tom</sup> mouse (scale bar=200μm). (b) Example of *in situ* hybridization for *som* RNA. (c) Examples of coexpression of *som* RNA and the Tomato protein (evinced by immunohistochemistry, scale bar=50μm). (d) Another example of *som* and *chrna2* coexpression. *Inset*, Venn diagram showing the number of cells that exclusively expressed *som* (green; n=394), co-expressed *som* and *chrna2* (yellow; n=214) or only *chrna2* RNA (red; n=11).

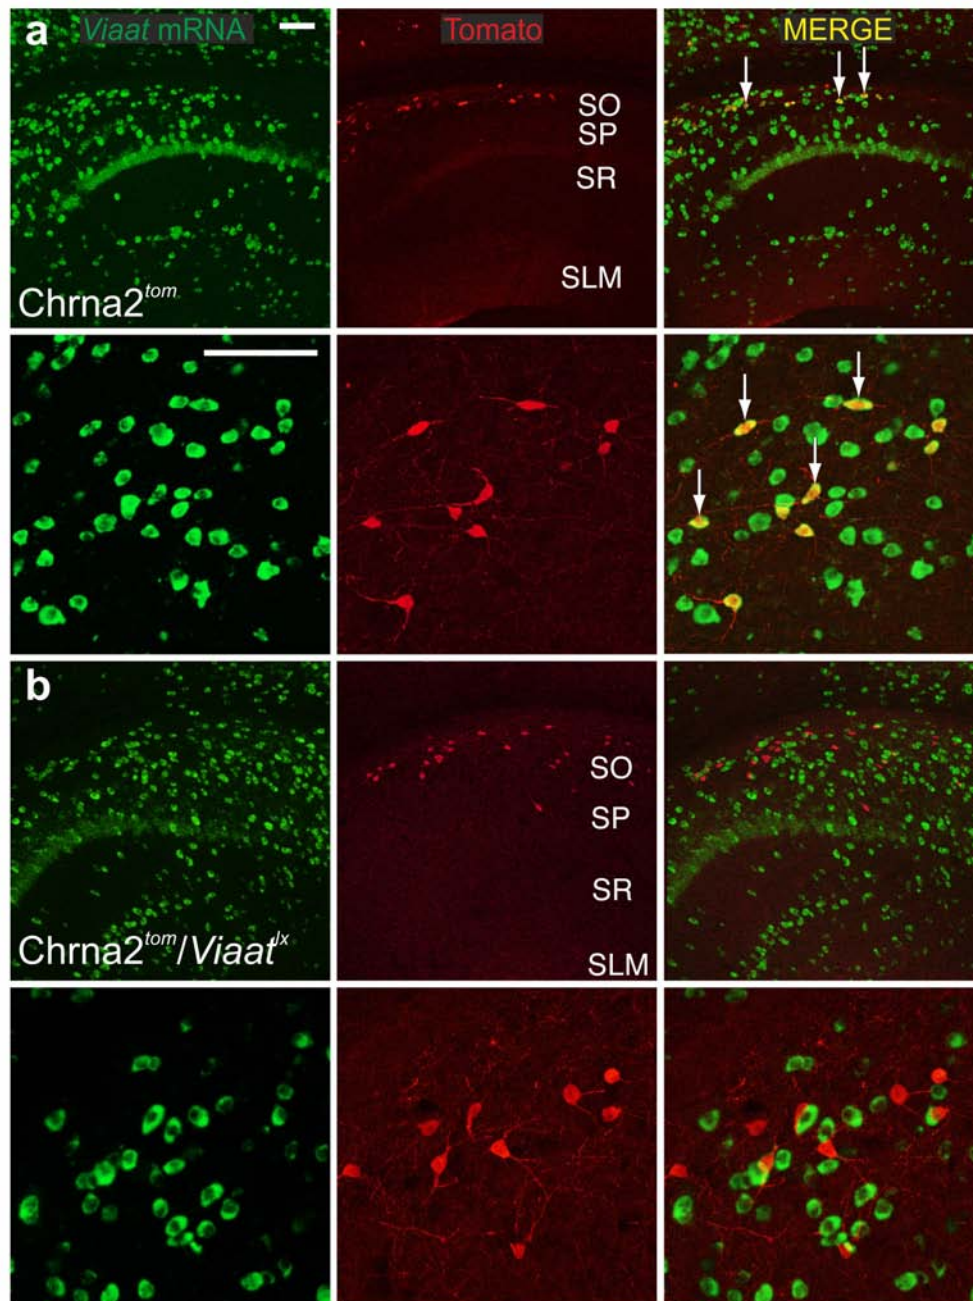

**Supplementary Figure 2. *Viaat* mRNA is selectively lost in OLM<sup>α2</sup> cells in *Chrna2-cre/Viaat<sup>lox</sup>* mice.** Fluorescent photomicrographs of horizontal hippocampal sections of *Chrna2-cre/R26<sup>tom</sup>* animals obtained by laser-scanning confocal microscopy. *Chrna2-cre* activity and *Viaat* mRNA expression in cell bodies were visualized by combined immunofluorescence for Red Fluorescent Protein (RFP, red) to detect tdTomato expressing cells and fluorescent *in situ* hybridization for *Viaat* (green). **(a)** All *Chrna2-cre* positive cells also expressed *Viaat* mRNA in sections from *Chrna2-cre/R26<sup>tom</sup>* mice (n=103). Arrowheads indicate cells positive for both *Viaat* mRNA and *Chrna2-cre* activity. **(b)** The majority (>90%, n=145 out of 160) of *Chrna2-cre* positive cells in sections from *Chrna2-cre/R26<sup>tom</sup>/Viaat<sup>lox</sup>* were no longer positive for *Viaat* mRNA expression. SO - stratum oriens, SP - stratum pyramidale, SR - stratum radiatum, SLM - stratum lacunosum moleculare. Scale bar=100μm.

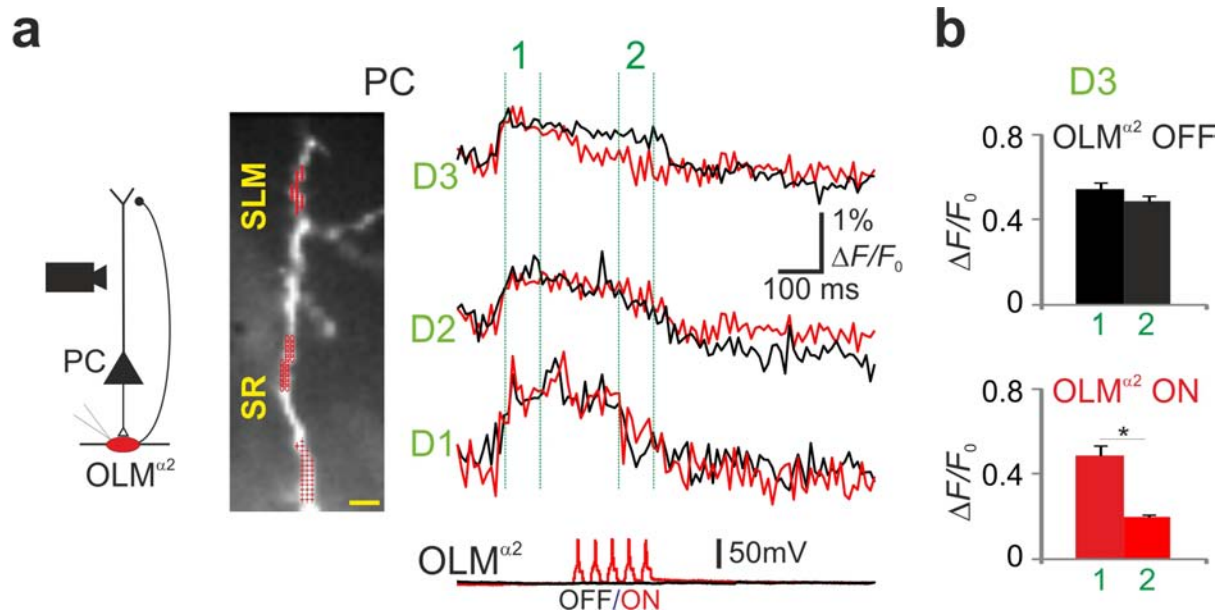

**Supplementary Figure 3. OLM<sup>α2</sup> cells inhibit distal apical dendrites of PCs. (a)** Fluorescence changes of a PC apical dendrite filled with voltage sensitive dye (VSD) in response to a depolarizing current step at the PC soma. Recordings were made while a connected OLM<sup>α2</sup> cell was either silent (black traces, OLM<sup>α2</sup> OFF) or firing (red traces, OLM<sup>α2</sup> ON). The current clamp traces of the OLM<sup>α2</sup> neuron are shown in the bottom. The three sets of fluorescence traces were obtained from three locations of the PC dendrite (shown in red in the micrograph, scale bar=20μm): proximal (D1), intermediate (D2) and distal (D3). **(b)** Mean fluorescence change of the distal PC dendrite (D3) at the onset (period '1' in **a**) and at the end (period '2') of the somatic depolarization step with (bottom) and without (top) OLM<sup>α2</sup> cell firing (\**p*<0.05). OLM<sup>α2</sup> cell spikes were elicited 200ms after the onset of the depolarization step.

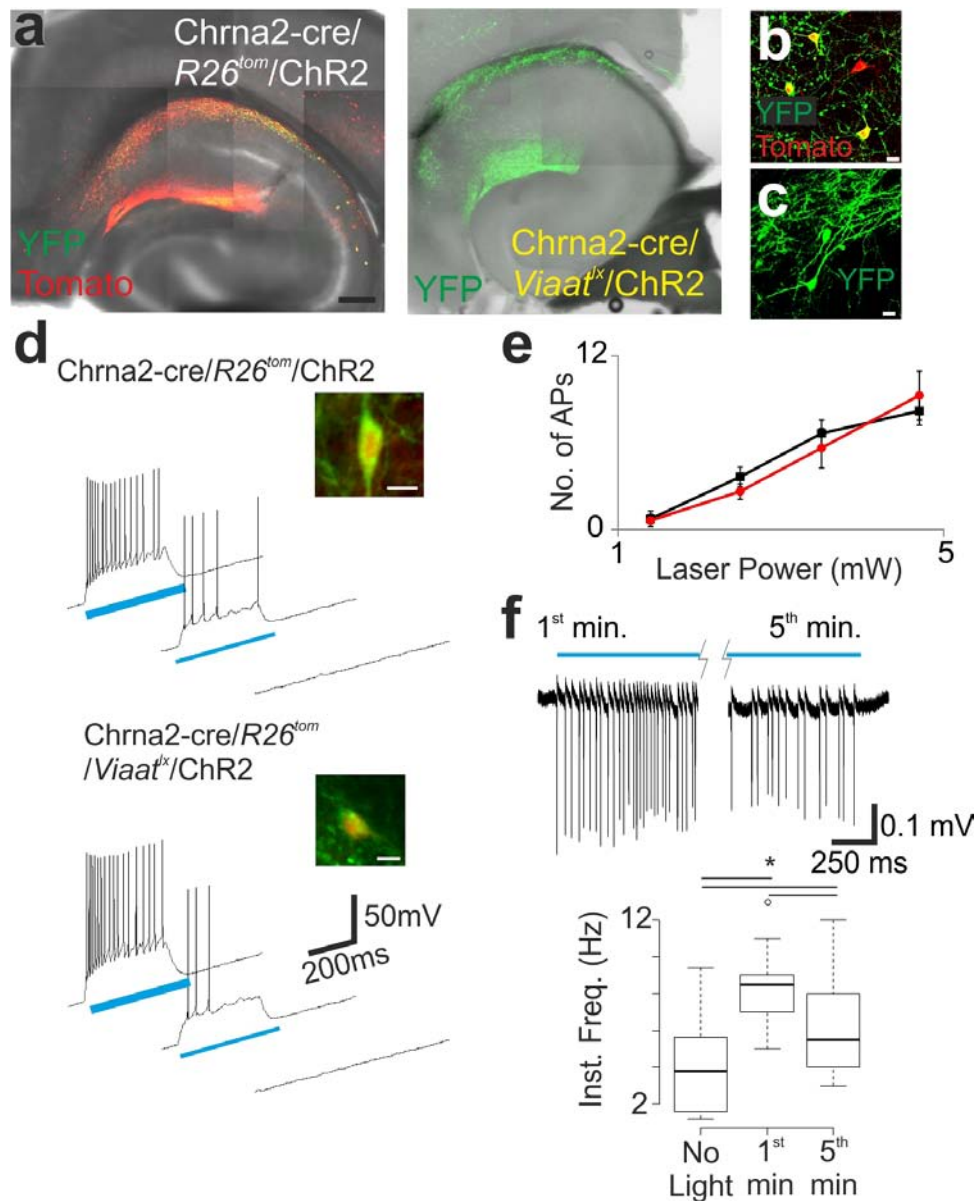

**Supplementary Figure 4. Cre driven channelrhodopsin expression is similar in *Chrna2-cre/ChR2* and *Chrna2-cre/viaat<sup>lx</sup>/ChR2* animals.** (a) Photomicrograph of a hippocampal section of a *Chrna2-cre* (left; Tomato reporter) and a *Chrna2-cre/Viaat<sup>lx</sup>* mouse (right; no reporter) transduced with the light-sensitive channel hChR2 (fused with YFP). Scale bar=200 $\mu$ m. (b,c) Expression of YFP in Tomato+ cells in hChR2-YFP-transduced *Chrna2-cre/R26<sup>tom</sup>* (b) and *Chrna2-cre/Viaat<sup>lx</sup>* animals (c). Scale bar=20 $\mu$ m. (d) Whole cell responses of hChR2 expressing OLM <sup>$\alpha$ 2</sup> cells in hippocampal slices from *Chrna2-cre/R26<sup>tom</sup>* and *Chrna2-cre/R26<sup>tom</sup>/Viaat<sup>lx</sup>* mice in response to 2.5mW and 3.5mW laser pulse. (e) Total laser power vs. number of APs in response to a 400ms laser pulse in OLM<sup>ChR2</sup> cells in *Chrna2-cre* (black trace) and *Chrna2-cre/Viaat<sup>lx</sup>* (red trace). (f) Top, cell-attached recordings showing firing adaptation of OLM<sup>ChR2</sup> cells in *Chrna2-cre* mice during a 5-min 1.4mW laser pulse. Bottom, boxplot summarizing the firing frequency of OLM<sup>ChR2</sup> neurons at rest, and during the 1<sup>st</sup> and 5<sup>th</sup> minute following the onset of the laser pulse (\*p<0.05).

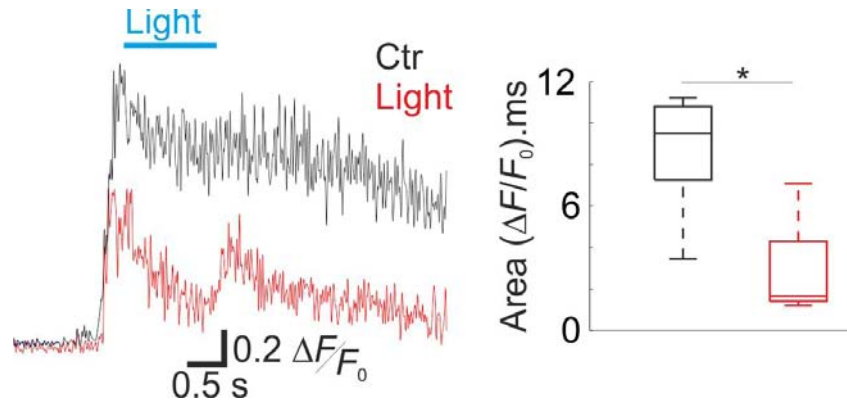

**Supplementary Figure 5. OLM cell stimulation inhibits TA excitatory responses at SLM.**

Fluorescence changes at SLM following TA stimulation in control with or without application of a 1.4mW laser light pulse (left). Excitation of OLM<sup>ChR2</sup> cells with light produced a large inhibition at SLM measured as the area under the curve of the fluorescence signal change in response to TA stimulation (right). \*p<0.05.

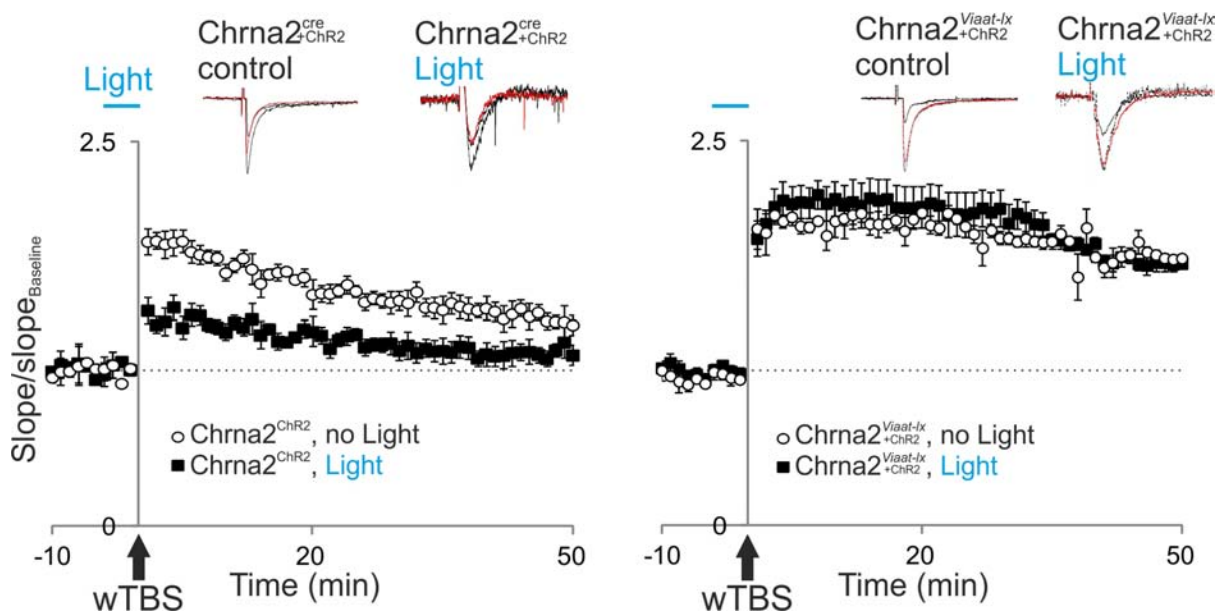

**Supplementary Figure 6. Light activation of OLM<sup>α2</sup> cells suppresses LTP in the TA pathway.**

Left, potentiation of TA-PC synapses in Chrna2-cre/ChR2 mice during control conditions (no light; open circles) or upon blue light stimulation (black squares). Right, as before but for Chrna2-cre/*Vlaat*<sup>lx</sup>/ChR2 mice. Top traces show fEPSPs before, 10 and 30 min after wTBS.

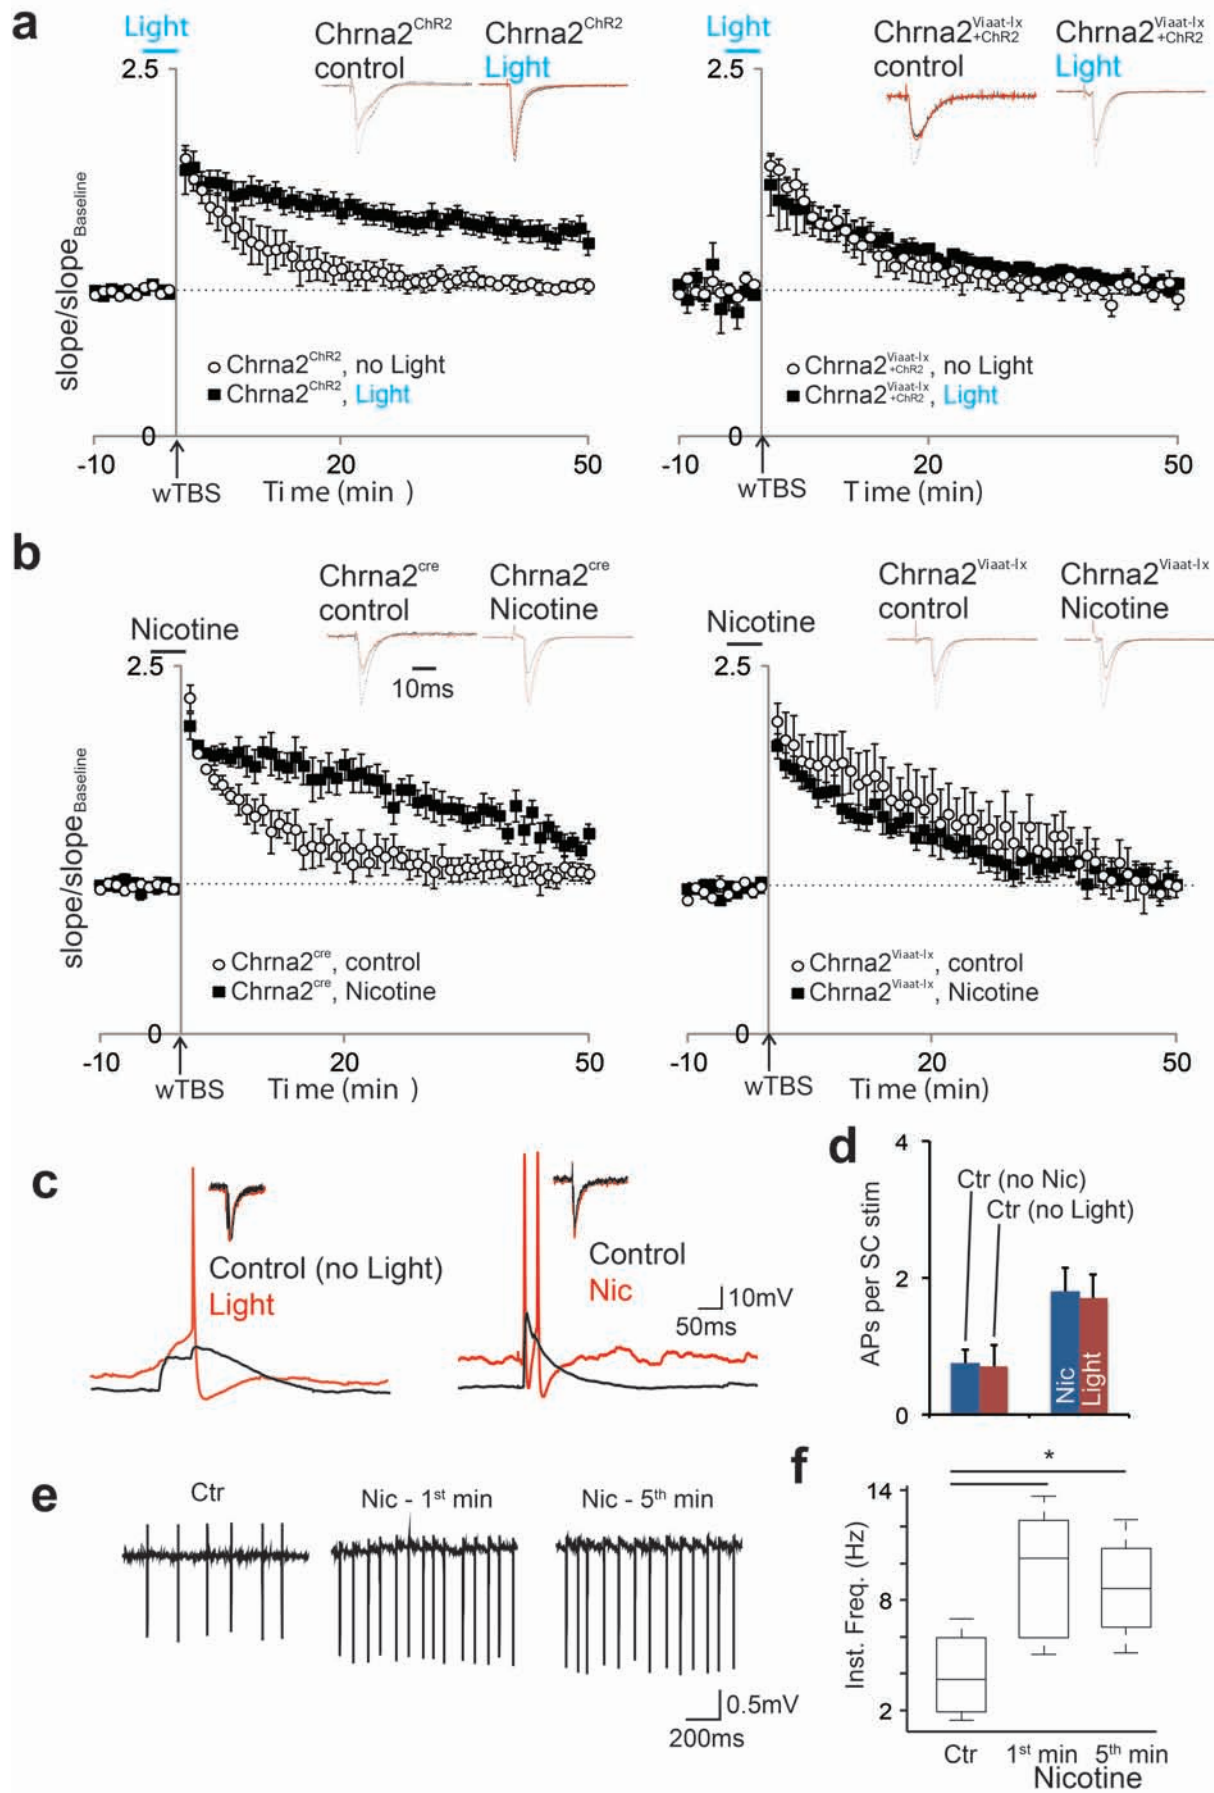

**Supplementary Figure 7. Light activation of OLM $\alpha^2$  cells induces LTP in the SC pathway** (a) Left, potentiation of SC-CA1 synapses in Chrna2-cre/ChR2 mice during control conditions (no light; open circles) or upon blue light stimulation (black squares). Right, as before but for Chrna2-cre/*Viaat*<sup>lx</sup>/ChR2 mice. Top traces show fEPSPs before, 10 and 30 min after wTBS. (b) Left, potentiation of SC-CA1 synapses in Chrna2-cre mice without (open circles, control) and with application of 1 $\mu$ M nicotine (black squares). *Right*, As before but for Chrna2-cre/*Viaat*<sup>lx</sup> mice. (c) Current clamp recordings showing membrane potential changes in OLM $\alpha^2$  cells following a single SC stimulation in control conditions or in the presence of light or nicotine. (d) Mean number of APs triggered in OLM $\alpha^2$  cells by a single SC stimulation in control conditions or in the presence of light or 1 $\mu$ M nicotine. Notice similar changes in resting membrane potential with light and nicotine application. (e) Cell attached recordings of OLM $\alpha^2$  neurons in control conditions and in response to the application of 1 $\mu$ M nicotine (example recordings during the 1<sup>st</sup> and the 5<sup>th</sup> minute of nicotine application). (f) Summary of firing frequency of OLM $\alpha^2$  neurons in control conditions, 1<sup>st</sup> and 5<sup>th</sup> minute after nicotine application (\* denotes  $p < 0.01$ ).

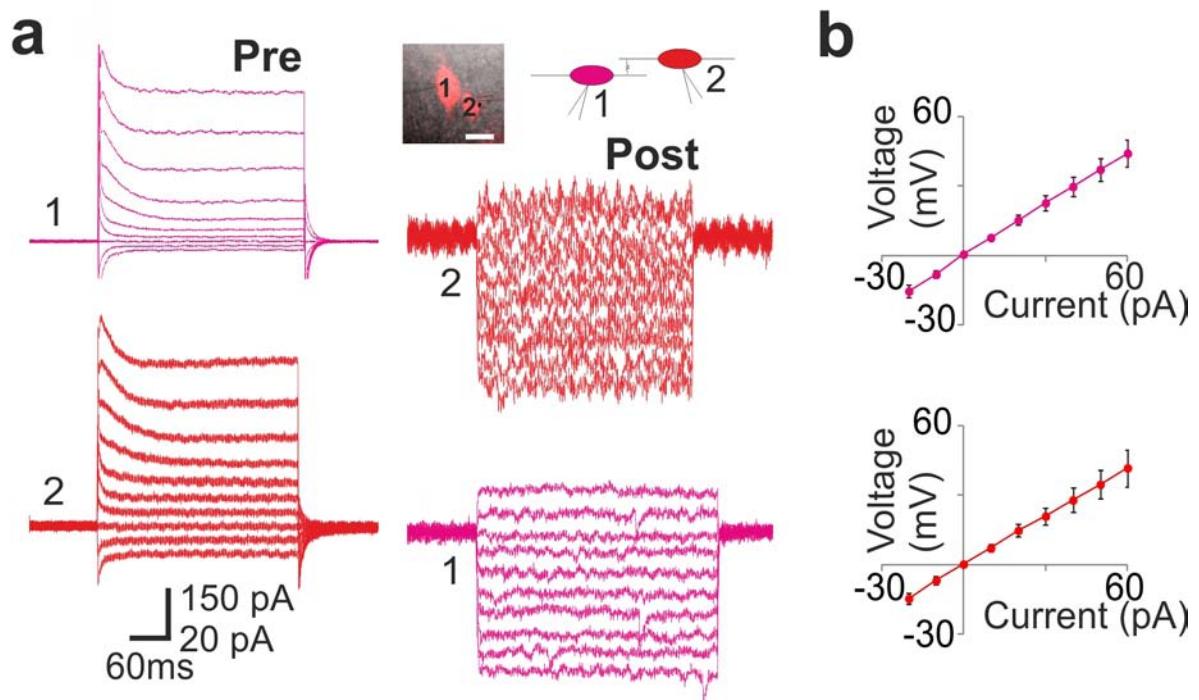

**Supplementary Figure 8. OLM $\alpha^2$  cells are electrically connected.** (a) Presynaptic depolarizing voltage steps (-20 to +60mV, -60mV holding) resulted in pre- and postsynaptic outward currents in a CA1 OLM $\alpha^2$  cell pair (photomicrograph on the top, scale bar=20 $\mu$ m). (b) Mean junction potential vs. postsynaptic current relationships (bidirectional; 1 $\rightarrow$ 2, 2 $\rightarrow$ 1) of four electrically connected CA1 OLM $\alpha^2$  cell pairs.



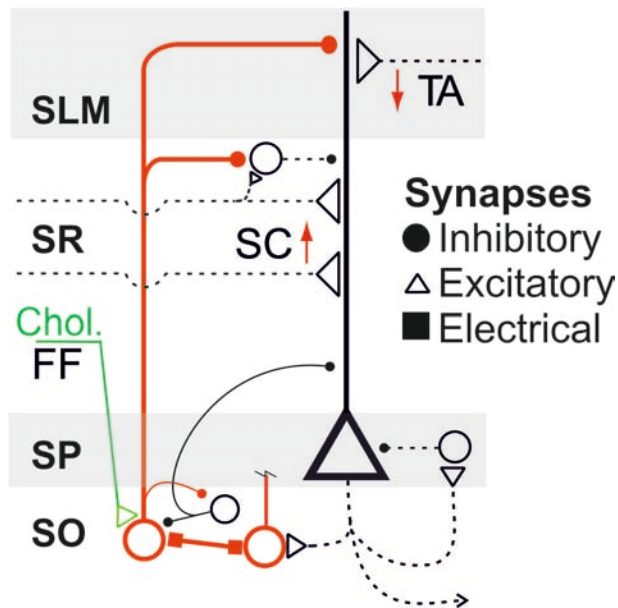

**Supplementary Figure 9. Schematic representation of the CA1 OLM cell microcircuit.** Red arrows represent the potentiation effect from OLM<sup>α2</sup> cell (red) activation on SC-CA1 and TA-CA1 synapses. Cholinergic inputs from the fimbria fornix (FF) are represented in green. Other interneurons represented here are basket cells in SP, SC-associated interneurons in SR and BS neurons in SO (SLM, *s. lacunosum-moleculare*; SR, *s. radiatum*; SP, *s. pyramidale*; SO, *s. oriens*; TA, temporoammonic pathway; SC, Schaffer collateral pathway).
